# Supplementary material for: Prognostic Value of Liquid-Biopsy-Based Biomarkers in Upper Tract Urothelial Carcinoma
Source: MDPI journal article supplement (doi:10.3390/ijms25073695), 2024-03-26
Supplement: s1 [file s1]

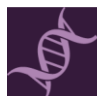

## TABLES – SUPPLEMENTARY MATERIAL

Table S1. cfDNA levels quantification.

| Patient number | Pre-surgery cfDNA levels (ng/ml) | Post-surgery cfDNA levels (ng/ml) | Progressive (P) | Deceased (D) |
|----------------|----------------------------------|-----------------------------------|-----------------|--------------|
| 1              | 11,69                            | 6,75                              |                 |              |
| 2              | 35                               | 18,12                             |                 |              |
| 3              | 8,12                             | 18,9                              | P               | D            |
| 4              | 32,27                            | 37,03                             | P               | D            |
| 5              | 4,83                             | 3,19                              |                 |              |
| 6              | 3,94                             | 8,33                              |                 |              |
| 7              | 9,28                             | 8,89                              | P               |              |
| 8              | 17,85                            | 26,04                             | P               |              |
| 9              | 5,81                             | 4,06                              |                 |              |
| 10             | 6,65                             | 5,53                              |                 |              |
| 11             | 10,06                            | 15,67                             |                 |              |
| 12             | 4,06                             | 6,40                              |                 |              |
| 13             | 4,40                             | 1,23                              |                 |              |
| 14             | 8,91                             | 2,33                              |                 |              |
| 15             | 3,33                             | 3,94                              |                 |              |
| 16             | 5,95                             | 5,25                              | P               |              |
| 17             | 9,38                             | 7,2                               |                 |              |
| 18             | 6,24                             | 42,88                             | P               | D            |
| 19             | 12,72                            | 11,81                             |                 |              |
| 20             | 17,76                            | 4,9                               | P               |              |
